# Supplementary material for: Laccase–mediator co-immobilized doped-HKUST-1 cellulose composite beads and their application for the biodegradation of carbazole
Source: Royal Society of Chemistry journal article supplement (doi:10.1039/d3re00253e), 2023-01-01
Supplement: d3re00253e1.pdf [file d3re00253e1.pdf]

## **Supplementary Materials**

### **laccase-mediator co-immobilized into dopped-HKUST-1 cellulose composite beads and its application for biodegradation of carbazole**

Jia Juan, Xue Ping\*, Liu Xueping, Xu Chongrui, Gu Yaohua, Li Peng

State Key Laboratory of High-efficiency Coal Utilization and Green Chemical Engineering, College of  
Chemistry & Chemical Engineering, Ningxia University, Yinchuan 750021, China

---

\* Corresponding author.  
*Email address:* ping@nxu.edu.cn (P. Xue)

## **Table of Contents**

Fig. S1 Mass spectra of HPLC-MS after the complete degradation of carbazole

Fig. S2 Reusability of Lac@Ce-GMA-Cu-DA@AS

Fig. S3 Effect of pH on the degradation of carbazole by Lac@Ce-GMA-Cu-DA@AS

Fig. S4 Effect of temperature on the degradation of carbazole by Lac@Ce-GMA-Cu-DA@AS

Table S1 Michaelis-Menten kinetic parameters of free laccase and immobilized enzyme

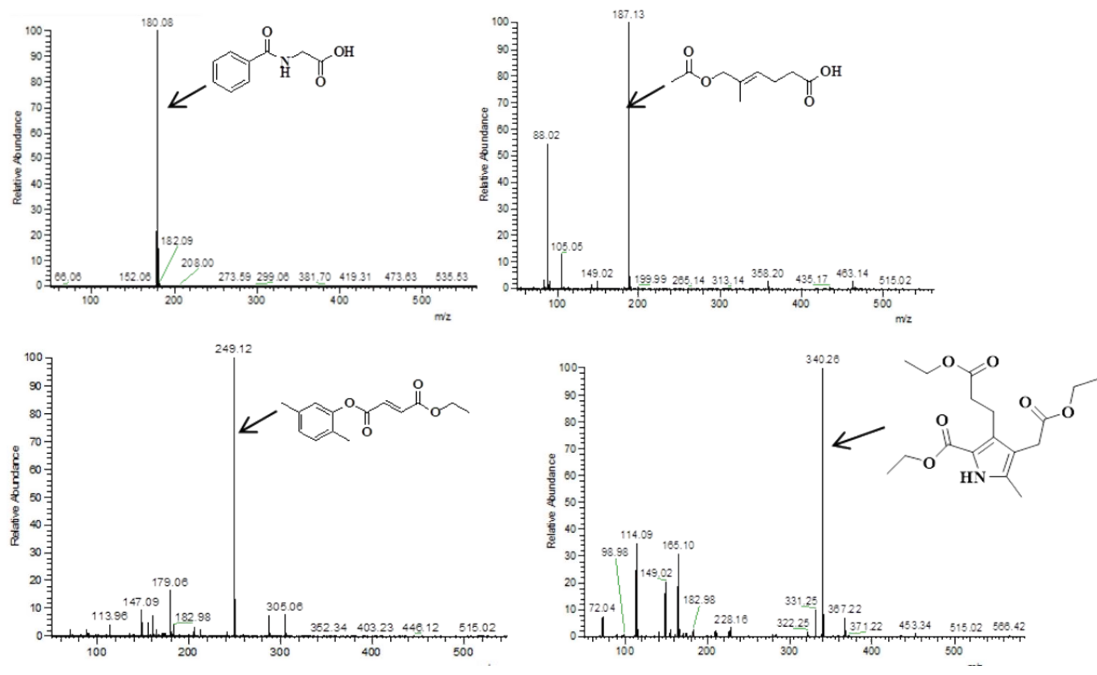

**Fig. S1** Mass spectra of HPLC-MS after the complete degradation of carbazole

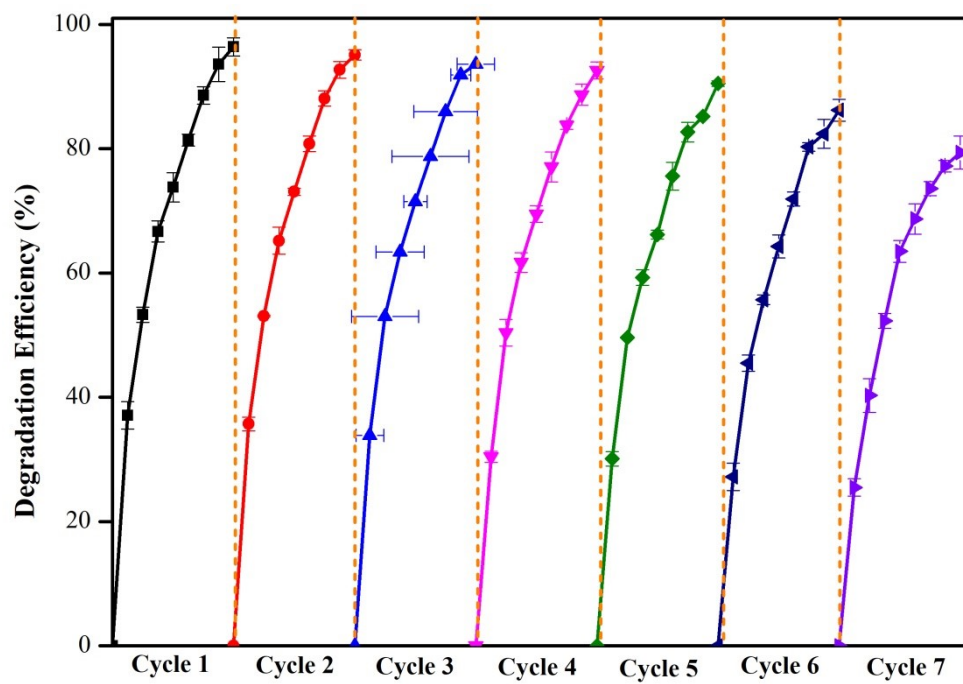

Fig. S2 Reusability of Lac@Ce-GMA-Cu-DA@AS

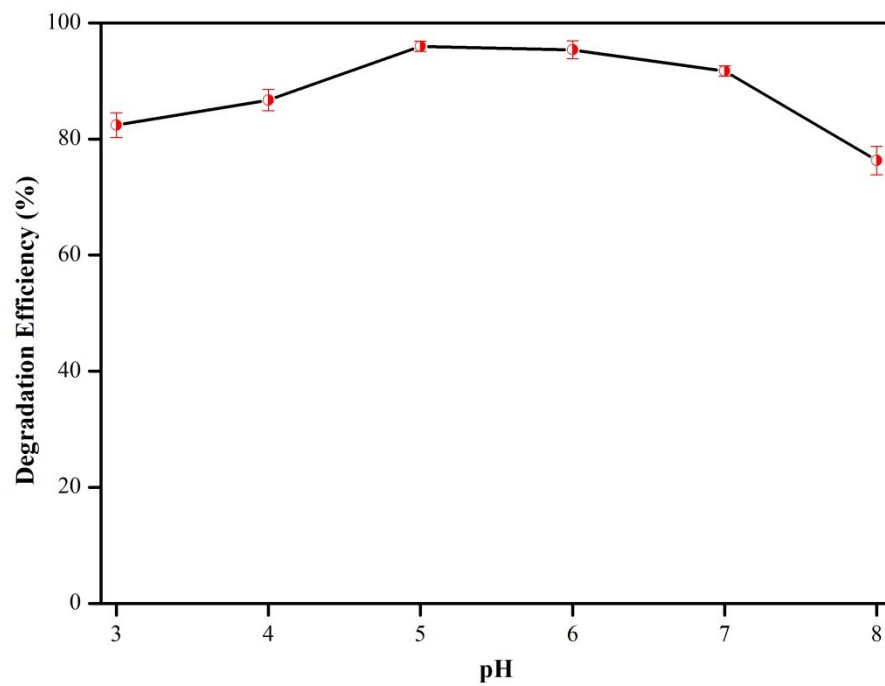

**Fig. S3** Effect of pH on the degradation of carbazole by Lac@Ce-GMA-Cu-DA@AS

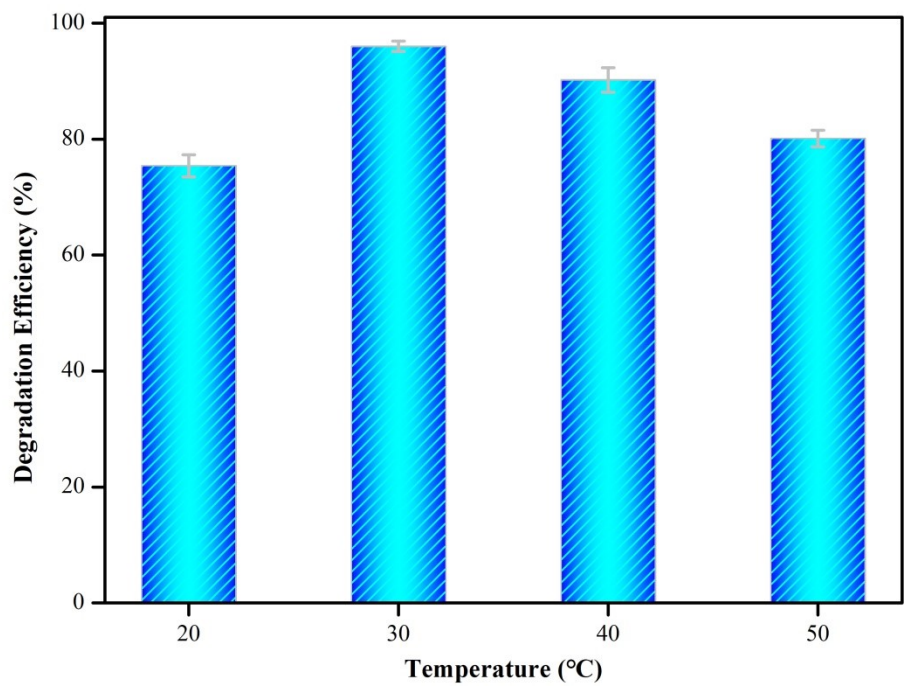

**Fig. S4** Effect of temperature on the degradation of carbazole by Lac@Ce-GMA-Cu-DA@AS

**Table S1 Michaelis-Menten kinetic parameters of free laccase and immobilized enzyme**

| <b>Samples</b>     | <b>Michaelis-Menten kinetic parameters</b> |                                 |
|--------------------|--------------------------------------------|---------------------------------|
|                    | <b>K<sub>m</sub> (mM)</b>                  | <b>V<sub>max</sub> (mM/min)</b> |
| free laccase       | 0.032                                      | 0.056                           |
| immobilized enzyme | 0.041                                      | 0.084                           |
